# Supplementary material for: Traditions for Future Cross-National Food Security—Food and Foraging Practices among Different Native Communities in the Western Himalayas
Source: MDPI journal article supplement (doi:10.3390/biology11030455), 2022-03-16
Supplement: s1 [file s1]

**Table S1.** Gastronomic usage of local flora and fauna in different regions of study area

| S.No.  | Species<br>(Family)<br>(Voucher number)                                           | Vernacular<br>name                                   | Part used      | Usage                                      | Bio-geographic regions |     |     |     | Ethnic<br>groups                                    | Use<br>value | Citation |
|--------|-----------------------------------------------------------------------------------|------------------------------------------------------|----------------|--------------------------------------------|------------------------|-----|-----|-----|-----------------------------------------------------|--------------|----------|
|        |                                                                                   |                                                      |                |                                            | KAS                    | JAM | LAD | AJK |                                                     |              |          |
| Plants |                                                                                   |                                                      |                |                                            |                        |     |     |     |                                                     |              |          |
| 1      | <i>Abies pindrow</i> (Royle ex D. Don) Royle.<br>(Pinaceae)<br>(SMH-401, AJK-233) | Baddul (KAS)<br>Partal,<br>Palundar (AJK)            | Root<br>Bark   | Boiled in water and<br>used as tea.        | Y                      | N   | N   | Y   | Gujjar,<br>Pahari,<br>Bakarwal                      | 0.20         | 189      |
| 2      | <i>Acacia modesta</i> Wall.<br>(Fabaceae)<br>(AJK-234)                            | Plai (AJK)                                           | Gum            | Chewed raw as gum.                         | N                      | N   | N   | Y   | Gujjar,<br>Pahari                                   | 0.22         | 215      |
| 3      | <i>Aconitum heterophyllum</i> Wall. ex Royle<br>(Ranunculaceae)<br>(SMH-405)      | Patrees, Atees<br>(KAS)                              | Leaves         | Cooked as vegetables.                      | Y                      | N   | N   | N   | Gujjar,<br>Pahar,<br>Bakarwal                       | 0.23         | 216      |
| 4      | <i>Acorus calamus</i> L.<br>(Asteraceae)<br>(SMH-407)                             | Bariyan,<br>Bareen (KAS)<br>Shu-dag-nag-<br>po (LAD) | Rhizome        | Added in tea to<br>enhance flavour.        | Y                      | N   | Y   | N   | Kashmiri,<br>Gujjar,<br>Pahari,<br>Balti,<br>Brokpa | 0.18         | 175      |
| 5      | <i>Aesculus indica</i> (Wall. ex Cambess.)<br>Hook.<br>(Sapindaceae)<br>(SMH-110) | Goon,<br>Haandoon,<br>Khanor (KAS)                   | Fruit          | Fruits are crushed<br>and making flour.    | Y                      | N   | N   | N   | Gujjar,<br>Pahari,<br>Bakarwal                      | 0.20         | 188      |
| 6      | <i>Allium semenovii</i> Regel.<br>(Amaryllidaceae)<br>(SMH-413)                   | Wan pran, Ek<br>pothi lahsun<br>(KAS)                | Leaves<br>Root | Leaves are used as<br>vegetables and roots | Y                      | N   | N   | N   | Kashmiri,<br>Gujjar,                                | 0.25         | 239      |

|    |                                                                                               |                                                                    |                   |                                                                                             |   |   |   |   |                                                                 |      |     |
|----|-----------------------------------------------------------------------------------------------|--------------------------------------------------------------------|-------------------|---------------------------------------------------------------------------------------------|---|---|---|---|-----------------------------------------------------------------|------|-----|
|    |                                                                                               |                                                                    |                   | are used as spice and<br>condiment.<br>Muslim scholars<br>probit the use before<br>prayers. |   |   |   |   | Pahari,<br>Bakarwal                                             |      |     |
| 7  | <i>Amaranthus viridis</i> L.<br>(Amaranthaceae)<br>(SMH- 303, AJK-235)                        | Kanhaar,<br>Ganar,<br>Ghanar (KAS,<br>AJK, JAM)                    | Leaves            | Boiled, fried and<br>consumed as<br>vegetable.                                              | Y | Y | N | Y | Kashmiri,<br>Gujjar,<br>Pahari,<br>Dogra                        | 0.30 | 285 |
| 8  | <i>Anethum graveolens</i> L.<br>(Apiaceae)<br>(AJK-236)                                       | Soe, Sowa, Dill<br>(AJK)                                           | Leaves            | Cooked as vegetable,<br>and used as flavoring<br>in salads.                                 | N | N | N | Y | Kashmiri,<br>Gujjar,<br>Pahari                                  | 0.18 | 168 |
| 9  | <i>Arnebia bethemii</i> (Wall. ex G. Don.)<br>Johnst.<br>(Boraginaceae)<br>(SMH-304, AJK-237) | Ghaozban<br>(KAS)<br>Kahzawain<br>(AJK, JAM)                       | Root              | Used to make tea;<br>same tea is also used<br>to cure pneumonia<br>and flu.                 | Y | Y | N | Y | Kashmiri,<br>Gujjar,<br>Pahari,<br>Bakarwal,<br>Dogra           | 0.31 | 299 |
| 10 | <i>Arnebia euchroma</i> Royle.<br>(Boraginaceae)<br>(SMH-418, AJK-238)                        | Ratanjog (KAS,<br>AJK, JAM)<br>Demok, Dre<br>mog, Bri-mog<br>(LAD) | Roots<br>Leaves   | Roots are used as<br>spices, and leaves are<br>taken with tea to<br>enhance flavor.         | Y | N | Y | Y | Kashmiri,<br>Gujjar,<br>Pahari,<br>Bakarwal,<br>Brokpa,<br>Beda | 0.24 | 234 |
| 11 | <i>Artemisia gmelinii</i> var. <i>gmelinii</i> Weber<br>ex Steckm.<br>(Asteraceae)            | Bur tsemkhan<br>pa (LAD)                                           | Leaves<br>Flowers | Leaves and flowers<br>are mixed with wheat                                                  | N | N | Y | N | Brokpa,<br>Beda, Balti                                          | 0.23 | 217 |

|    |                                                                            |                                                         |                   |                                                             |   |   |   |   |                                             |      |     |
|----|----------------------------------------------------------------------------|---------------------------------------------------------|-------------------|-------------------------------------------------------------|---|---|---|---|---------------------------------------------|------|-----|
|    | (SMH-305)                                                                  |                                                         |                   | flour and water to prepare ferments.                        |   |   |   |   |                                             |      |     |
| 12 | <i>Asparagus gracilis</i> Royl.<br>(Asparagaceae)<br>(AJK-239)             | Shagandal<br>(AJK)                                      | Whole plant       | Used as vegetable.                                          | N | N | N | Y | Gujjar,<br>Pahari,                          | 0.21 | 200 |
| 13 | <i>Astragalus graveolens</i> Benth.<br>(Fabaceae)<br>(AJK-240)             | Yurikund<br>(AJK)                                       | Fruit             | Eaten as raw.                                               | N | N | N | Y | Gujjar,<br>Pahari                           | 0.20 | 195 |
| 14 | <i>Bauhinia variegata</i> L.<br>(Fabaceae)<br>(AJK-241)                    | Kalyari (JAM),<br>Katchnar,<br>Kachnar (AJK)            | Flower            | Cooked as vegetable.                                        | N | Y | N | Y | Gujjar,<br>Pahari,<br>Bakarwal,<br>Dogra    | 0.18 | 179 |
| 15 | <i>Berberis asiatica</i> Roxb. ex DC.<br>(Berberidaceae)<br>(SMH-420)      | Kaimbli (KAS),<br>Kingora (JAM)                         | Fruit             | Eaten raw.                                                  | Y | Y | N | N | Gujjar,<br>Pahari,<br>Bakarwal              | 0.30 | 285 |
| 16 | <i>Berberis lycium</i> Royle<br>(Berberidaceae)<br>(SMH-306, AJK-242)      | Kaimbli (KAS),<br>Kingora (JAM),<br>Sumbloo (AJK)       | Fruit             | Ripe bluish fruits are consumed raw.                        | Y | Y | N | Y | Gujjar,<br>Pahari,<br>Bakarwal              | 0.26 | 246 |
| 17 | <i>Bergenia ciliata</i> (Haw.) Sternb.<br>(Saxifragaceae)<br>(SMH-202)     | Palfut,<br>Zakhmehayat<br>(KAS),<br>Pshanbheda(J<br>AM) | Leaves<br>Rhizome | Leaves are cooked as food. Rhizomes are used as herbal tea. | Y | Y | N | N | Kashmiri,<br>Gujjar,<br>Pahari,<br>Bakarwal | 0.27 | 256 |
| 18 | <i>Bergenia stracheyi</i> (Hook. f. & Thomson)<br>Engl.<br>(Saxifragaceae) | Sapdotri<br>(JAM),<br>Katkotar (KAS)                    | Rhizome           | Boiled to yield a decoction and taken as tea substitute.    | Y | Y | N | N | Kashmiri,<br>Gujjar,                        | 0.25 | 243 |

|    |                                                                           |                                                         |                  |                                                                |   |   |   |   |                                                       |      |     |
|----|---------------------------------------------------------------------------|---------------------------------------------------------|------------------|----------------------------------------------------------------|---|---|---|---|-------------------------------------------------------|------|-----|
|    | (SMH-423)                                                                 |                                                         |                  |                                                                |   |   |   |   | Pahari,<br>Bakarwal                                   |      |     |
| 19 | <i>Betula utilis</i> D. Don.<br>(Betulaceae)<br>(SMH-425)                 | Bhojpatra,<br>Burza (KAS)                               | Bark             | Boiled in water for<br>making herbal tea.                      | Y | N | N | N | Kashmiri,<br>Gujjar,<br>Pahari,<br>Bakarwal           | 0.22 | 214 |
| 20 | <i>Bombax ceiba</i> L.<br>(Malvaceae)<br>(SMH-307)                        | Simbal (JAM)                                            | Flower           | Cooked as vegetable<br>and used for making<br>tea.             | N | Y | N | N | Gujjar,<br>Pahari,<br>Bakarwal,<br>Dogra              | 0.17 | 165 |
| 21 | <i>Brassica campestris</i> L.<br>(Brassicaceae)<br>(SMH-523, AJK-243)     | Sarsoon (JAM),<br>Tailgogal<br>(KAS), Sarryan<br>(AJK)  | Leaves<br>Seed   | Leaves are cooked as<br>vegetables. Oil is<br>used in cooking. | Y | Y | N | Y | Kashmiri,<br>Gujjar,<br>Pahari                        | 0.25 | 243 |
| 22 | <i>Bunium persicum</i> Bioss.<br>(Apiaceae)<br>(SMH-308)                  | Kala zeera<br>(JAM)<br>Zuur (KAS)                       | Seed             | Used as flavouring<br>agent in different<br>dishes.            | Y | Y | N | N | Kashmiri,<br>Gujjar,<br>Pahari,<br>Bakarwal,<br>Dogra | 0.33 | 315 |
| 23 | <i>Capparis spinosa</i> L.<br>(Capparaceae)<br>(SMH-160)                  | Kabra (LAD)                                             | Fruit            | Unripe fruits are<br>cooked as vegetables.                     | N | N | Y | N | Balti,<br>Brokpa,<br>Beda                             | 0.22 | 213 |
| 24 | <i>Capsella bursa-pastoris</i> (L.) Medik.<br>(Brassicaceae)<br>(SMH-427) | Kralmond<br>(KAS), Hiri<br>halian(JAM),<br>Shamsho(LAD) | Leaves<br>Shoots | Cooked as vegetable.                                           | Y | Y | Y | N | Kashmiri,<br>Gujjar,<br>Pahari,<br>Dogra,             | 0.37 | 354 |

|     |                                                                                |                                                                     |                |                                                       |   |   |   |   |                                              |      |     |
|-----|--------------------------------------------------------------------------------|---------------------------------------------------------------------|----------------|-------------------------------------------------------|---|---|---|---|----------------------------------------------|------|-----|
|     |                                                                                |                                                                     |                |                                                       |   |   |   |   | Balti,<br>Brokpa,<br>Beda                    |      |     |
| 25  | <i>Caralluma edulis</i> (Edgew.) Bth. and Hk.<br>(Asclepiadaceae)<br>(AJK-244) | Chunga, Pippa<br>(AJK)                                              | Whole<br>plant | Cooked as vegetable.                                  | N | N | N | Y | Kashmiri,<br>Gujjar<br>Pahari                | 0.22 | 212 |
| 26  | <i>Carissa spinarum</i> L.<br>(Apocynaceae)<br>(AJK-245)                       | Ganrada (AJK)                                                       | Fruit          | Eaten raw.                                            | N | N | N | Y | Bakarwal,<br>Gujjar<br>Pahari                | 0.20 | 189 |
| 27  | <i>Carissa carandas</i> L.<br>(Apocynaceae)<br>(SMH-310)                       | Karonda,<br>Garna (JAM)                                             | Fruit          | Eaten raw.                                            | N | Y | N | N | Gujjar,<br>Pahari,<br>Dogra                  | 0.20 | 195 |
| 28  | <i>Carum carvi</i> L.<br>(Apiaceae) (SMH-104)                                  | Kosnyot, Go-<br>snyod (LAD)                                         | Seed           | Used as flavoring<br>agent in a variety of<br>dishes. | N | N | Y | N | Balti,<br>Brokpa                             | 0.19 | 185 |
| 29. | <i>Cassia fistula</i> L.<br>(Fabaceae)<br>(SMH-311)                            | Korangal<br>(JAM)                                                   | Flower         | Cooked as vegetables.                                 | N | Y | N | N | Bakarwal,<br>Dogra                           | 0.21 | 199 |
| 30  | <i>Celtis australis</i> L.<br>(Cannabaceae)<br>(SMH-430)                       | Bramij, Bramiji<br>(KAS)                                            | Fruit          | Eaten raw.                                            | Y | N | N | N | Kashmiri,<br>Pahari,<br>Bakarwal             | 0.25 | 237 |
| 31  | <i>Chenopodium album</i> L.<br>(Chenopodiaceae)<br>(SMH-430, AJK-246)          | Tangthour<br>chonma, Sneu<br>(LAD), Bathwa<br>(AJK), Bathu<br>(KAS) | Leaves         | Cooked as vegetable.                                  | Y | N | Y | Y | Kashmiri,<br>Gujjar,<br>Pahari,<br>Bakarwal, | 0.32 | 310 |

|    |                                                                       |                                            |                              |                                                        |   |   |   |   |                                             |      |     |
|----|-----------------------------------------------------------------------|--------------------------------------------|------------------------------|--------------------------------------------------------|---|---|---|---|---------------------------------------------|------|-----|
|    |                                                                       |                                            |                              |                                                        |   |   |   |   | Balti,<br>Brokpa                            |      |     |
| 32 | <i>Chenopodium murale</i> L.<br>(Chenopodiaceae)<br>(AJK-247)         | Bathwa (AJK)                               | Leaves                       | Cooked as vegetable.                                   | N | N | N | Y | Kashmiri,<br>Pahari,<br>Bakarwal            | 0.33 | 315 |
| 33 | <i>Cichorium intybus</i> L.<br>(Asteraceae)<br>(SMH-312, AJK-248)     | Handh (KAS),<br>Bathwa (AJK)               | Leaves                       | Cooked as a<br>vegetable and also<br>used to make tea. | Y | N | N | Y | Kashmiri,<br>Bakarwal,<br>Gujjar,<br>Pahari | 0.37 | 350 |
| 34 | <i>Cissus carnosa</i> (L) Lamk.<br>(Vitaceae)<br>(AJK-249)            | Dakh (AJK)                                 | Fruit                        | Eaten raw.                                             | N | N | N | Y | Kashmiri,<br>Gujjar,<br>Pahari              | 0.25 | 241 |
| 35 | <i>Citrus acida</i> L.<br>(Rutaceae)<br>(AJK-250)                     | Khatta (AJK)                               | Fruit                        | Used to make pickles.                                  | N | N | N | Y | Gujjar,<br>Pahari,<br>Bakarwal,             | 0.22 | 211 |
| 36 | <i>Commelina benghalensis</i> L.<br>(Commelinaceae)<br>(AJK-251)      | Kanchara<br>(AJK), Kanteri<br>(JAM)        | Leaves                       | Cooked as vegetable.                                   | N | Y | N | Y | Gujjar,<br>Dogra                            | 0.22 | 208 |
| 37 | <i>Conyza canadensis</i> (L.) Cronquist.<br>(Asteraceae)<br>(AJK-252) | Kutahudy<br>(AJK)                          | Young<br>leaves<br>Seedlings | Young leaves and<br>seedlings are cooked<br>with rice. | N | N | N | Y | Kashmiri,<br>Gujjar,<br>Pahari              | 0.24 | 231 |
| 38 | <i>Coriandrum sativum</i> L.<br>(Apiaceae)<br>(SMH-315, AJK-253)      | Daanvaal<br>(KAS),<br>Dhanya<br>(JAM, AJK) | Leaves<br>Shoots             | Used in curries to<br>enhance flavor.                  | Y | Y | N | Y | Pahari,<br>Gujjar,<br>Bakarwal,<br>Brokpa   | 0.33 | 316 |

|    |                                                                                     |                                                             |                   |                                                                              |   |   |   |   |                                             |      |     |
|----|-------------------------------------------------------------------------------------|-------------------------------------------------------------|-------------------|------------------------------------------------------------------------------|---|---|---|---|---------------------------------------------|------|-----|
| 39 | <i>Dactylorhiza hatagirea</i> (D. Don) Soó.<br>(Orchidaceae)<br>(SMH-436)           | Salam, Panja,<br>Hathajari<br>(KAS)                         | Tubers            | The powder of dried tubers is mixed with ghee and eaten.                     | Y | N | N | N | Gujjar,<br>Pahari,<br>Bakarwal              | 0.22 | 214 |
| 40 | <i>Delphinium brunonianum</i> Royle<br>(Ranunculaceae)<br>(SMH-105)                 | Byargodspos,<br>Lunde aaown,<br>Mask-<br>larksupur<br>(LAD) | Leaves<br>Flowers | Leaves and flowers are mixed with wheat flour and water to prepare ferments. | N | N | Y | N | Brokpa,<br>Balti                            | 0.23 | 219 |
| 41 | <i>Dioscorea deltoidea</i> Wall. ex Griseb.<br>(Dioscoreaceae)<br>(SMH-441)         | Tard, Yam<br>(KAS)                                          | Leaves            | Boiled and consumed as vegetable.                                            | Y | N | N | N | Gujjar,<br>Pahari,<br>Bakarwal              | 0.23 | 220 |
| 42 | <i>Dryopteris stewartii</i> Fraser-Jenk.<br>(Dryopteridaceae)<br>(SMH-443, AJK-254) | Kunji (AJK),<br>Longad (KAS)                                | Leaves            | Young leaves collected in spring are cooked as vegetable.                    | Y | N | N | Y | Kashmiri,<br>Pahari, Gujjar,<br>Bakarwal    | 0.30 | 285 |
| 43 | <i>Duchesnea indica</i> (Jacks.) Focke.<br>(Rosaceae)<br>(SMH-316)                  | Sarpingdach<br>(JAM)<br>Zarkash (KAS)                       | Fruit             | Fresh ripe fruits are eaten raw.                                             | Y | Y | N | N | Kashmiri,<br>Gujjar,<br>Pahari,<br>Bakarwal | 0.23 | 218 |
| 44 | <i>Elaeagnus angustifolia</i> L.<br>(Elaeagnaceae)<br>(AJK-255)                     | Konkol (AJK)                                                | Fruit             | Eaten raw.                                                                   | N | N | N | Y | Kashmiri,<br>Gujjar,<br>Pahari              | 0.20 | 194 |
| 45 | <i>Elaeagnus parvifolia</i> Wall. ex Royle<br>(Elaeagnaceae)<br>(AJK-256)           | Kankoli (AJK)                                               | Fruit             | Used as a raw jam and preservative.                                          | N | N | N | Y | Kashmiri,<br>Gujjar,<br>Pahari              | 0.18 | 168 |

|    |                                                                                    |                                            |        |                                                           |   |   |   |   |                                                     |      |     |
|----|------------------------------------------------------------------------------------|--------------------------------------------|--------|-----------------------------------------------------------|---|---|---|---|-----------------------------------------------------|------|-----|
| 46 | <i>Elaeagnus umbellata</i> Thunb.<br>(Elaeagnaceae)<br>(SMH-317, AJK-257)          | Kankoli (AJK,<br>JAM)                      | Fruit  | Eaten raw.                                                | N | Y | N | Y | Gujjar,<br>Pahari,<br>Dogra                         | 0.26 | 247 |
| 47 | <i>Emblica officinalis</i> Gaertn.<br>(Phyllanthaceae)<br>(SMH-318)                | Amla (JAM)                                 | Fruit  | Eaten raw.                                                | N | Y | N | N | Kashmiri,<br>Pahari,<br>Gujjar,<br>Dogra            | 0.20 | 194 |
| 48 | <i>Eremurus himalaicus</i> Baker.<br>(Asphodelaceae)<br>(SMH-446)                  | Sheil-haakh<br>(KAS), Vellun<br>(KAS)      | Leaves | Boiled, cooked like<br>cabbage, and used as<br>vegetable. | Y | N | N | N | Gujjar,<br>Paharil,<br>Bakarwal                     | 0.23 | 217 |
| 49 | <i>Fagopyrum esculentum</i> Moench.<br>(Polygonaceae)<br>(SMH-449)                 | Tromba (KAS,<br>JAM), Dyat<br>chonma (LAD) | Leaf   | Boiled and used as<br>vegetable.                          | Y | Y | Y | N | Kashmiri,<br>Pahari,<br>Gujjar,<br>Brokpa,<br>Balti | 0.23 | 218 |
| 50 | <i>Ficus carica</i> L.<br>(Moraceae)<br>(AJK-258)                                  | Tosi, Tossa<br>(AJK)                       | Fruit  | Eaten fresh and<br>sometimes dried for<br>later use.      | N | N | N | Y | Pahari,<br>Gujjar,                                  | 0.30 | 285 |
| 51 | <i>Ficus palmata</i> Roxb.<br>(Moraceae)<br>(SMH-319, AJK-259)                     | Anjeer (JAM),<br>Kemri (AJK)               | Fruit  | Eaten fresh and<br>sometimes dried for<br>later use.      | N | Y | N | Y | Gujjar,<br>Pahari,<br>Dogra                         | 0.23 | 216 |
| 52 | <i>Flacourtia indica</i> (Burm.) Merrill<br>(Flacourtiaceae)<br>(SMH-320, AJK-260) | Kanju (JAM),<br>Kakoh (AJK)                | Fruit  | Eaten raw.                                                | N | Y | N | Y | Gujjar,<br>Pahari,<br>Dogra                         | 0.23 | 220 |



|    |                                                                                              |                                                     |                  |                                                                                                                             |   |   |   |   |                                             |      |     |
|----|----------------------------------------------------------------------------------------------|-----------------------------------------------------|------------------|-----------------------------------------------------------------------------------------------------------------------------|---|---|---|---|---------------------------------------------|------|-----|
| 53 | <i>Foeniculum vulgare</i> (Mill)<br>(Apiaceae)<br>(SMH-322)                                  | Badyaan<br>(KAS), Saunf<br>(JAM)                    | Seed             | Used as flavoring agent in different dishes.                                                                                | Y | Y | N | N | Kashmiri,<br>Gujjar<br>Pahari,<br>Dogra     | 0.33 | 318 |
| 54 | <i>Fragaria nubicola</i> (Lindl. ex Hook. f.)<br>Lacaita<br>(Rosaceae)<br>(SMH-450, AJK-261) | Jangli-gonch<br>(KAS), Buddha<br>Mewa (JAM,<br>AJK) | Fruit            | Eaten with craze because of pleasant strawberry flavor. And roots are used to make herbal tea local Pahari, Bakarwal people | Y | Y | N | Y | Kashmiri,<br>Pahari,<br>Gujjar,<br>Bakarwal | 0.34 | 324 |
| 55 | <i>Galinsoga parviflora</i> Cav.<br>(Asteraceae)<br>(SMH-323)                                | Mirchghas<br>(KAS),<br>Galinsoga<br>(JAM)           | Leaves           | Cooked and fried with spices as vegetable.                                                                                  | Y | Y | N | N | Kashmiri,<br>Pahari<br>Gujjar,<br>Bakarwal  | 0.22 | 216 |
| 56 | <i>Heracleum candicans</i> Wall.ex DC.<br>Apiaceae<br>(SMH-454)                              | Mirkul (KAS)                                        | Leaves           | Used as salad especially by Bakarwal people.                                                                                | Y | N | N | N | Gujjar,<br>Pahari,<br>Bakarwal              | 0.25 | 241 |
| 57 | <i>Hippophae rhamnoides</i> L.<br>(Eleagnaceae)<br>(SMH-156)                                 | Sastalulu,<br>Tshogskyur,<br>Star bu (LAD)          | Fruit            | Eaten raw and nowadays a juice is industrially prepared from them.                                                          | N | N | Y | N | Beda, Balti,<br>Brokpa                      | 0.22 | 218 |
| 58 | <i>Juglans regia</i> L<br>(Juglandaceae)<br>(SMH-326, AJK-262)                               | Dun (KAS),<br>Akhrot, Khoad<br>(AJK)                | Kernel<br>Walnut | Kernels are eaten raw, and oil is used in cooking. male inflorescence is boiled                                             | Y | N | N | Y | Kashmiri,<br>Gujjar,<br>Pahari,<br>Bakarwal | 0.33 | 316 |

|    |                                                                                |                                         |                           |                                                         |   |   |   |   |                                                       |      |     |
|----|--------------------------------------------------------------------------------|-----------------------------------------|---------------------------|---------------------------------------------------------|---|---|---|---|-------------------------------------------------------|------|-----|
|    |                                                                                |                                         | male<br>Infloresce<br>nce | dried and used as<br>vegetables in winter<br>season     |   |   |   |   |                                                       |      |     |
| 59 | <i>Lamium amplexicaule</i> L.<br>(Lamiaceae)<br>(SMH-327, AJK-263)             | Godrii (AJK,<br>JAM)                    | Leaves                    | Used as vegetable.                                      | N | Y | N | Y | Gujjar,<br>Pahari,<br>Dogri                           | 0.23 | 220 |
| 60 | <i>Leucas cephalotes</i> (Roth.) Spreng.<br>(Lamiaceae)<br>(AJK-264)           | Chara, Gut<br>dode, Guma<br>(AJK)       | Leaves<br>Shoot           | Cooked as vegetable.                                    | N | N | N | Y | Gujjar,<br>Pahari                                     | 0.22 | 216 |
| 61 | <i>Luffa cylindrica</i> (L.) M. Roem.<br>(Cucurbitaceae)<br>(SMH-328, AJK-265) | Toori (AJK,<br>JAM)                     | Fruit                     | Cooked as vegetable.                                    | N | Y | N | Y | Gujjar,<br>Pahari,<br>Dogri                           | 0.22 | 213 |
| 62 | <i>Malva neglecta</i> Wallr.<br>(Malvaceae)<br>(SMH-465)                       | Sonchal (KAS),<br>Suchal Sabzi<br>(JAM) | Leaves                    | Cooked and used as<br>vegetable, also used<br>as salad. | Y | Y | N | N | Kashmiri,<br>Pahari,<br>Gujjar,<br>Bakarwal,<br>Dogri | 0.33 | 316 |
| 63 | <i>Malva parviflora</i> L.<br>(Malvaceae)<br>(AJK-267)                         | Sonchal (AJK)                           | Leaves                    | Cooked as vegetable.                                    | N | N | N | Y | Gujjar,<br>Pahari                                     | 0.33 | 318 |
| 64 | <i>Malva verticillata</i> L.<br>(Malvaceae)<br>(SMH-329)                       | Icham-pa<br>(LAD)                       | Leaves                    | Cooked as vegetable.                                    | N | N | Y | N | Brokpa,<br>Balti                                      | 0.29 | 279 |
| 65 | <i>Medicago polymorpha</i> L.<br>(Fabaceae)<br>(AJK-268)                       | Sriri, Sri (AJK)                        | Leaves                    | Cooked as vegetable.                                    | N | N | N | Y | Gujjar,Pah<br>ari                                     | 0.22 | 210 |

|    |                                                                         |                                                      |                  |                                                                                                 |   |   |   |   |                                                     |      |     |
|----|-------------------------------------------------------------------------|------------------------------------------------------|------------------|-------------------------------------------------------------------------------------------------|---|---|---|---|-----------------------------------------------------|------|-----|
| 66 | <i>Mentha arvensis</i> L.<br>(Lamiaceae)<br>(SMH-467)                   | Pudun (KAS),<br>Podina (JAM)                         | Leaves           | Used as spice and<br>condiments, also used<br>to make paste called<br>chutney”                  | Y | Y | N | N | Kashmiri,<br>Pahari,<br>Dogra                       | 0.34 | 328 |
| 67 | <i>Mentha longifolia</i> L.<br>(Lamiaceae)<br>(SMH-330, AJK-269)        | Pudun,<br>ChittaPotna<br>(KAS, AJK),<br>Podina (JAM) | Leaves           | Used as spice and<br>condiments, also used<br>to make paste called<br>chutney                   | Y | Y | N | Y | Kashmiri,<br>Pahari,<br>Dogra                       | 0.26 | 246 |
| 68 | <i>Micromeria biflora</i> (Ham.) Bth.<br>(Lamiaceae)<br>(AJK-270)       | Narayshamaka<br>y, Ban ajwain<br>(AJK)               | Flower<br>Leaves | Dried flowers and<br>young leaves are used<br>to make tea and<br>flavoring agent in<br>curries. | N | N | N | Y | Kashmiri,<br>Pahari                                 | 0.20 | 196 |
| 69 | <i>Momordica dioica</i> Roxb. ex Willd.<br>(Cucurbitaceae)<br>(SMH-331) | Kokora (JAM)                                         | Fruit            | Cooked as vegetable.                                                                            | N | Y | N | N | Gujjar,Pah<br>ari,Dogra,                            | 0.21 | 199 |
| 70 | <i>Morus alba</i> L.<br>(Moraceae)<br>(SMH-334)                         | Tul, Toot<br>(KAS), Dar<br>shing (LAD)               | Fruit            | Eaten raw.                                                                                      | Y | N | Y | N | Kashmiri,<br>Gujjar,<br>Pahari,<br>Balti,<br>Brokpa | 0.29 | 279 |
| 71 | <i>Morus nigra</i> L.<br>(Moraceae)<br>(SMH-335)                        | Tul, Shah toot<br>(KAS), Sang<br>(LAD)               | Fruit            | Dark red fruits are<br>eaten raw.                                                               | Y | N | Y | N | Kashmiri,<br>Gujjar<br>Pahari,<br>Balti,<br>Brokpa  | 0.31 | 295 |

|    |                                                                   |                                          |                |                                                                                                              |   |   |   |   |                                          |      |     |
|----|-------------------------------------------------------------------|------------------------------------------|----------------|--------------------------------------------------------------------------------------------------------------|---|---|---|---|------------------------------------------|------|-----|
| 72 | <i>Nasturtium officinale</i> R. Br<br>(Brassicaceae)<br>(AJK-271) | Taramira (AJK)                           | Leaves         | Cooked as vegetable.                                                                                         | N | N | N | Y | Gujjar,<br>Bakarwal                      | 0.28 | 265 |
| 73 | <i>Nepeta floccosa</i> Benth.<br>(Lamiaceae)<br>(SMH-153)         | Shamalolo,<br>Shngukram<br>(LAD)         | Leaves<br>Stem | The dried leaves and<br>shoots are used to<br>flavor local dishes.                                           | N | N | Y | N | Brokpa,<br>Balti                         | 0.29 | 275 |
| 74 | <i>Olea ferruginea</i> Royle<br>(Oleaceae)<br>(AJK-272)           | Kahu (AJK)                               | Leaves         | Used to make tea                                                                                             | N | N | N | Y | Kashmiri,<br>Gujjar<br>Pahari            | 0.22 | 210 |
| 75 | <i>Ocimum basilicum</i> L.<br>(Lamiaceae)<br>(SMH-336)            | Baboori, Babar<br>(KAS), Maling<br>(JAM) | Seed           | Used in making<br>beverages called<br>“sharbat” to beat<br>summer heat.                                      | Y | Y | N | N | Kashmiri,<br>Gujjar,<br>Pahari,<br>Dogri | 0.21 | 200 |
| 76 | <i>Onopordum acanthium</i> L<br>(Asteraceae)<br>(AJK-273)         | Kandyara<br>(AJK)                        | Whole<br>plant | Leaves and young<br>plants are cooked as<br>vegetables.                                                      | N | N | N | Y | Gujjar,<br>Pahari                        | 0.25 | 235 |
| 77 | <i>Oenothera rosea</i> L.<br>(Onagraceae)<br>(AJK-274)            | Jungli gulab<br>(AJK)                    | Root<br>Shoot  | Young roots are<br>cooked as vegetable<br>(with a peppery<br>flavour). Shoots are<br>used as a salad.        | N | N | N | Y | Gujjar,<br>Pahari                        | 0.21 | 199 |
| 78 | <i>Origanum vulgare</i> L.<br>(Lamiaceae)<br>(SMH-522, AJK-275)   | Ganeyar (KAS),<br>Banjawain<br>(AJK)     | Leaves         | Cooked as vegetable,<br>often used as a salad,<br>dried leaves are<br>boiled in water to<br>make herbal tea. | Y | N | N | Y | Kashmiri,<br>Gujjar,<br>Pahari           | 0.25 | 237 |

|    |                                                                         |                                                 |        |                                                         |   |   |   |   |                                          |      |     |
|----|-------------------------------------------------------------------------|-------------------------------------------------|--------|---------------------------------------------------------|---|---|---|---|------------------------------------------|------|-----|
| 79 | <i>Oxalis corniculata</i> L.<br>(Oxalidaceae)<br>(AJK-276)              | Khatibuti (AJK)                                 | Leaves | Cooked as vegetable.                                    | N | N | N | Y | Gujjar,<br>Pahari                        | 0.24 | 234 |
| 80 | <i>Oxyria digyna</i> Hill<br>(Polygonaceae)<br>(SMH-337)                | Lamanchu,<br>Chu lcum<br>(LAD)                  | Leaves | Cooked as vegetable.                                    | N | N | Y | N | Balti,<br>Brokpa                         | 0.21 | 198 |
| 81 | <i>Phyllanthus emblica</i> L.<br>(Phyllanthaceae)<br>(SMH-338, AJK-277) | Amla (JAM,<br>AJK)                              | Fruit  | Used to make pickles<br>and sometimes eaten<br>raw.     | N | Y | N | Y | Gujjar,<br>Pahari,<br>Dogra              | 0.18 | 168 |
| 82 | <i>Phytolacca acinosa</i> Roxb.<br>(Phytolaccaceae)<br>(SMH-473)        | Hapat-makai<br>(KAS)                            | Leaves | Cooked and used as<br>vegetable.                        | Y | N | N | N | Gujjar,<br>Pahari,<br>Bakarwal           | 0.24 | 226 |
| 83 | <i>Plantago depressa</i> Willd.<br>(Plantaginaceae)<br>(SMH-140)        | Tha-ram (LAD)                                   | Leaves | Boiled and used as<br>vegetable.                        | N | N | Y | N | Brokpa,<br>Balti, Beda                   | 0.22 | 210 |
| 84 | <i>Plantago lanceolata</i> L.<br>(Plantaginaceae)<br>(SMH-478)          | Gul (KAS)                                       | Leaves | Boiled and used as<br>vegetable.                        | Y | N | N | N | Kashmiri                                 | 0.33 | 319 |
| 85 | <i>Plantago major</i> L.<br>(Plantaginaceae)<br>(SMH-479)               | Bud-gull (KAS)                                  | Leaves | Cooked as vegetable<br>especially by Gujjar<br>people.  | Y | N | N | N | Kashmiri,<br>Gujjar,<br>Pahari           | 0.34 | 327 |
| 86 | <i>Podophyllum hexandrum</i> Royle<br>(Berberidiaceae)<br>(SMH-481)     | Wanwagun,<br>Van Kakdi<br>(KAS), Hol-mo-<br>se, | Fruit  | Eaten as raw<br>especially by Gujjar,<br>Pahari people. | Y | N | Y | N | Kashmiri,<br>Gujjar,<br>Pahari, Bed<br>a | 0.36 | 345 |

|    |                                                                              |                                                       |                  |                                                                                                  |   |   |   |   |                                                  |      |     |
|----|------------------------------------------------------------------------------|-------------------------------------------------------|------------------|--------------------------------------------------------------------------------------------------|---|---|---|---|--------------------------------------------------|------|-----|
|    |                                                                              | Denmokushu (LAD)                                      |                  |                                                                                                  |   |   |   |   |                                                  |      |     |
| 87 | <i>Polygonum aviculare</i> L.<br>(Polygonaceae)<br>(SMH-151)                 | Endrani (LAD)<br>Drub<br>(KAS)Maachra<br>n chai (JAM) | Leaves           | Cooked as vegetable especially by Gujjar, Bakarwal people.                                       | Y | Y | Y | N | Kashmiri, Gujjar, Pahari, Bakarwal Brokpa, Balti | 0.23 | 219 |
| 88 | <i>Polygonum nepalense</i> Meissn.<br>(Polygonaceae)<br>(AJK-278)            | Hulla (AJK)                                           | Leaves<br>Shoot  | Young leaves, shoots eaten raw, cooked as vegetable.                                             | N | N | N | Y | Gujjar, Pahari                                   | 0.23 | 218 |
| 89 | <i>Polygonum amplexicaule</i> D. Don<br>(Polygonaceae)<br>(SMH-482, AJK-279) | Adder (JAM, AJK),<br>Maachran<br>(KAS)                | Rhizomes<br>Stem | Used for making tea and vegetable.                                                               | Y | Y | N | Y | Gujjar, Pahari, Bakarwal                         | 0.33 | 318 |
| 90 | <i>Portulaca oleracea</i> L.<br>(Portulacaceae)<br>(SMH-339)                 | Nunar (KAS),<br>Kulfa (JAM)                           | Leaves           | Cooked as vegetable especially by Kashmiri, Pahari people.                                       | Y | Y | N | N | Kashmiri, Gujjar, Pahari, Bakarwal, Dogra        | 0.36 | 346 |
| 91 | <i>Prunus armeniaca</i> L.,<br>(Rosaceae)<br>(SMH-340)                       | Khubani (KAS, JAM), Chuli,<br>Chair (LAD)             | Fruit            | Eaten raw. Dry Chuli/Chair are boiled in water and used as vegetable especially by Balti people. | Y | Y | Y | N | Kashmiri, Gujjar, Pahari, Beda, Balti Brokpa     | 0.26 | 245 |

|    |                                                                          |                                                                   |        |                                                                                                |   |   |   |   |                                                                        |      |     |
|----|--------------------------------------------------------------------------|-------------------------------------------------------------------|--------|------------------------------------------------------------------------------------------------|---|---|---|---|------------------------------------------------------------------------|------|-----|
| 92 | <i>Prunus cornuta</i> (Wall. ex Royle) Steud.<br>(Rosaceae)<br>(SMH-485) | Chuli (KAS)                                                       | Fruit  | Eaten raw.                                                                                     | Y | N | N | N | Gujjar,<br>Pahari                                                      | 0.29 | 278 |
| 93 | <i>Prunus domestica</i> L.<br>(Rosaceae)<br>(SMH-341)                    | Aloobukhra<br>(JAM), Aar<br>(KAS)                                 | Fruit  | Eaten raw.                                                                                     | Y | Y | N | N | Kashmiri,<br>Gujjar<br>Pahari,<br>Dogra                                | 0.30 | 282 |
| 94 | <i>Punica granatum</i> L.<br>(Lythraceae)<br>(SMH-342, AJK-280)          | Se-bru (LAD),<br>Daroona<br>(JAM),<br>Aaanar (AJK),<br>Daan (KAS) | Fruit  | Eaten raw. In<br>"Kashmiri" dried<br>fruits are used as<br>condiment by local<br>chefs (Waza). | Y | Y | Y | Y | Kashmiri,<br>Gujjar,<br>Pahari,<br>Bakarwal,<br>Beda, Balti,<br>Brokpa | 0.33 | 312 |
| 95 | <i>Pyrus pashia</i> Buch. Ham. ex D. Don<br>(Rosaceae)<br>(SMH-486)      | Kainthi (JAM)                                                     | Fruit  | Eaten raw.                                                                                     | N | Y | N | N | Gujjar,<br>Pahari<br>Bakarwal                                          | 0.29 | 274 |
| 96 | <i>Pyrus pyrifolia</i> (Burm. f.) Nakai.<br>(Rosaceae)<br>(SMH-343)      | Dandalli (JAM)                                                    | Fruit  | Eaten raw.                                                                                     | N | Y | N | N | Gujjar,Pah<br>ari                                                      | 0.23 | 216 |
| 97 | <i>Ranunculus sceleratus</i> L.<br>(Ranunculaceae)<br>(AJK-281)          | Korekandoli<br>(AJK)<br>Chambelbooti<br>(AJK)                     | Fruit  | Eaten raw.                                                                                     | N | N | N | Y | Kashmiri,<br>Gujjar,<br>Pahari                                         | 0.20 | 188 |
| 98 | <i>Rheum australe</i> D. Don<br>(Polygonaceae)<br>(SMH-345)              | Pambhak<br>(JAM),                                                 | Leaves | Cooked as vegetable.                                                                           | Y | Y | N | N | Kashmiri,<br>Gujjar,                                                   | 0.36 | 342 |

|     |                                                                                        |                                             |                |                                                                                                                             |   |   |   |   |                                             |      |     |
|-----|----------------------------------------------------------------------------------------|---------------------------------------------|----------------|-----------------------------------------------------------------------------------------------------------------------------|---|---|---|---|---------------------------------------------|------|-----|
|     |                                                                                        | Pambchalan<br>(KAS)                         |                |                                                                                                                             |   |   |   |   | Pahari,<br>Bakarwal                         |      |     |
| 99  | <i>Rheum spiciforme</i> Royle<br>(Polygonaceae)<br>(SMH-167)                           | Lachhu (LAD)<br>Chu rtsa (LAD)              | Stem           | Stem petioles and<br>young stems are<br>cooked as vegetables.<br>Stem petioles is also<br>chewed as raw by<br>local people. | N | N | Y | N | Brokpa,<br>Balti, Beda                      | 0.23 | 218 |
| 100 | <i>Rheum webbianum</i> Royle<br>(Polygonaceae)<br>(SMH-488)                            | Pambhak<br>(KAS), Chutyal<br>(JAM)          | Leaves<br>Stem | Cooked as vegetable.<br>Raw stems are<br>chewed by local<br>Gujjar, Pahari,<br>Bakarwal people                              | Y | Y | N | N | Kashmiri,<br>Gujjar,<br>Pahari,<br>Bakarwal | 0.25 | 238 |
| 101 | <i>Rhodiola sacra</i> (Prain ex Raym. Hamet)<br>S.H. Fu<br>(Crassulaceae)<br>(SMH-193) | Srolo-marpo<br>(LAD)                        | Leaves         | Cooked as vegetables.                                                                                                       | N | N | Y | N | Brokpa,<br>Balti, Beda                      | 0.20 | 196 |
| 102 | <i>Rhodiola imbricate</i> Edgew<br>(Crassulaceae)<br>(SMH-143)                         | Shro-Lo,<br>Shrolo, ho-<br>ngo-ngo<br>(LAD) | Leaves         | Used to make a<br>unique dish called<br>"Tantura".                                                                          | N | N | Y | N | Brokpa,<br>Balti, Beda                      | 0.22 | 210 |
| 103 | <i>Rhododendron arboreum</i> Sm.<br>(Ericaceae)<br>(SMH-347)                           | Gurans, Burans<br>(JAM)                     | Flower         | Cooked as vegetable<br>and used in tea.<br>Flowers are also used<br>to please Lord Shiva.                                   | N | Y | N | N | Gujjar,<br>Pahari ,<br>akarwal,<br>Dogra    | 0.23 | 218 |



|     |                                                                  |                                           |        |                                                    |   |   |   |   |                                              |      |     |
|-----|------------------------------------------------------------------|-------------------------------------------|--------|----------------------------------------------------|---|---|---|---|----------------------------------------------|------|-----|
| 104 | <i>Rosa moschata</i> Herrm.<br>(Rosaceae)<br>(SMH-348)           | Phulwadhi<br>(JAM),<br>Gulabposh<br>(KAS) | Fruit  | Eaten raw.                                         | Y | Y | N | N | Kashmiri,<br>Gujjar,<br>Pahari,<br>Dogra     | 0.30 | 285 |
| 105 | <i>Rosa sericea</i> Lindl.<br>(Rosaceae)<br>(SMH-149)            | Se ba (LAD)                               | Fruit  | Eaten raw.                                         | N | N | Y | N | Balti, Beda,<br>Brokpa                       | 0.26 | 246 |
| 106 | <i>Rosa webbiana</i> Wallich ex Royle<br>(Rosaceae)<br>(SMH-204) | Siah, Se ba<br>(LAD), Gulab<br>(KAS)      | Fruit  | Eaten by children,<br>also used to prepare<br>jam. | Y | N | Y | N | Kashmiri,<br>Gujjar<br>Pahari,<br>Balti,Beda | 0.29 | 275 |
| 107 | <i>Rubus ellipticus</i> Sm.<br>(Rosaceae)<br>(SMH-349, AJK-282)  | Akhray (KAS),<br>Peelaakra<br>(JAM, AJK)  | Fruit  | Eaten raw.                                         | Y | Y | N | Y | Gujjar,<br>Pahari                            | 0.21 | 198 |
| 108 | <i>Rubus fruticosus</i> Wallich.<br>(Rosaceae)<br>(AJK-283)      | Akhari (AJK)                              | Fruit  | Eaten raw.                                         | N | N | N | Y | Kashmiri,<br>Gujjar<br>Pahari                | 0.26 | 246 |
| 109 | <i>Rubus niveus</i> Thunb.<br>(Rosaceae)<br>(AJK-284)            | Pagnar (AJK)                              | Fruit  | Eaten raw.                                         | N | N | N | Y | Gujjar,<br>Pahari                            | 0.29 | 275 |
| 110 | <i>Rubus ulmifolius</i> Schott<br>(Rosaceae)<br>(SMH-350)        | Akhray (KAS,<br>JAM)                      | Fruit  | Eaten raw.                                         | Y | Y | N | N | Gujjar,<br>Pahari,<br>Bakarwal<br>Dogra      | 0.26 | 249 |
| 111 | <i>Rumex dentatus</i> L.<br>(Polygonaceae)                       | Abij (KAS),<br>Abugee (JAM)               | Leaves | Cooked as vegetable.                               | Y | Y | N | N | Kashmiri,<br>Gujjar,                         | 0.21 | 197 |

|     |                                                                                         |                                                                        |        |                                                                                                                                                                     |   |   |   |   |                                                     |      |     |
|-----|-----------------------------------------------------------------------------------------|------------------------------------------------------------------------|--------|---------------------------------------------------------------------------------------------------------------------------------------------------------------------|---|---|---|---|-----------------------------------------------------|------|-----|
|     | (SMH-491)                                                                               |                                                                        |        |                                                                                                                                                                     |   |   |   |   | Pahari,<br>Bakarwal                                 |      |     |
| 112 | <i>Rumex hastatus</i> Baldwin<br>(Polygonaceae)<br>(SMH-351)                            | Aula (KAS),<br>Khatimal<br>(JAM)                                       | Leaves | Eaten as salad.<br>Sometime leaves are<br>grinded mixed with<br>salt to form paste like<br>substance called<br>“chuteny” which s<br>then taken with other<br>foods. | Y | Y | N | N | Kashmiri,<br>Gujjar<br>Pahari,Bak<br>arwal<br>Dogra | 0.23 | 218 |
| 113 | <i>Rumex nepalensis</i> Spreng.<br>(Polygonaceae)<br>(SMH-492, AJK-285)                 | Jungli palak<br>(KAS), Ulla<br>(JAM)Sho-<br>mang (LAD),<br>Holla (AJK) | Leaves | Cooked as vegetable.                                                                                                                                                | Y | Y | Y | Y | Gujjar,<br>Pahari,<br>Bakarwal,<br>Dogra,<br>Brokpa | 0.34 | 321 |
| 114 | <i>Sambucus wightiana</i> Wall. ex Wight &<br>Arn.<br>(Adoxaceae)<br>(SMH-495, AJK-286) | Gandi (KAS),<br>Phakloon (AJK)                                         | Fruit  | Eaten raw by local<br>Gujjar, Pahari people.                                                                                                                        | Y | N | N | Y | Gujjar,<br>Pahari,<br>Bakarwal                      | 0.26 | 247 |
| 115 | <i>Saussurea costus</i> (Falc.) Lipsch.<br>(Asteraceae)<br>(SMH-352, AJK-287)           | Kuth (KAS,<br>AJK)                                                     | Leaves | Cooked with spices as<br>vegetable.                                                                                                                                 | Y | N | N | Y | Gujjar,<br>Pahari,<br>Bakarwal                      | 0.31 | 295 |
| 116 | <i>Sesamum orientale</i> L.<br>(Pedaliaceae)<br>(SMH-353)                               | Til (JAM)                                                              | Seed   | Eaten raw and<br>applied on the bread<br>to enhance taste.                                                                                                          | N | Y | N | N | Gujjar,<br>Pahari,<br>Bakarwa,<br>IDogra            | 0.20 | 188 |

|     |                                                                                               |                                                           |                |                                                                      |   |   |   |   |                                                                            |      |     |
|-----|-----------------------------------------------------------------------------------------------|-----------------------------------------------------------|----------------|----------------------------------------------------------------------|---|---|---|---|----------------------------------------------------------------------------|------|-----|
| 117 | <i>Solanum nigrum</i> L.<br>(Solanaceae)<br>(SMH-354, AJK-288)                                | Makoi (KAS),<br>Kachmach<br>(JAM), Maki<br>(AJK)          | Fruit          | Cooked as vegetable.                                                 | Y | Y | N | Y | Gujjar,<br>Pahari<br>Bakarwal                                              | 0.18 | 176 |
| 118 | <i>Sonchus asper</i> (L.) Hill.<br>(Asteraceae)<br>(AJK-289)                                  | Dodak (AJK)                                               | Whole<br>plant | Young leaves and<br>stem are cooked as<br>vegetable.                 | N | N | N | Y | Gujjar,<br>Pahari,<br>Bakarwal                                             | 0.27 | 256 |
| 119 | <i>Stellaria media</i> (L.) Vill.<br>(Caryophyllaceae)<br>(SMH-355)                           | Nick hakh<br>(KAS), Koku<br>(JAM)                         | Leaves         | Cooked as vegetable<br>at tender stage.                              | Y | Y | N | N | Kashmiri,<br>Gujjar,<br>Pahari,<br>Dogra                                   | 0.33 | 314 |
| 120 | <i>Taraxacum officinale</i> (L.) Weber ex F.H.<br>Wigg.<br>(Asteraceae)<br>(SMH-504, AJK-290) | Hand (KAS,<br>AJK), Han,<br>Khorma (LAD),<br>Handri (JAM) | Leaves         | Cooked as vegetable;<br>herbal tea is prepared<br>from fresh leaves. | Y | Y | Y | Y | Kashmiri,<br>Gujjar,<br>Pahari,<br>Bakarwal,<br>Dogra,<br>Balti,<br>Brokpa | 0.36 | 346 |
| 121 | <i>Taxus wallichiana</i> Zucc.<br>(Taxaceae)<br>(SMH-505)                                     | Bririmi, Oostul<br>(KAS)                                  | Bark           | Boiled in water and<br>taken as tea.                                 | Y | N | N | N | Gujjar,<br>Pahari,<br>Bakarwal                                             | 0.25 | 241 |
| 122 | <i>Terminalia bellirica</i> (Gaertn.) Roxb.<br>(Combretaceae)<br>(SMH-356)                    | Bhera, Bedda<br>(JAM)                                     | Fruit          | Pulp of fruit is eaten<br>raw.                                       | N | Y | N | N | Pahari,<br>Dogra                                                           | 0.23 | 219 |

|     |                                                                            |                                         |                |                                                                                                         |   |   |   |   |                                             |      |     |
|-----|----------------------------------------------------------------------------|-----------------------------------------|----------------|---------------------------------------------------------------------------------------------------------|---|---|---|---|---------------------------------------------|------|-----|
| 123 | <i>Thymus linearis</i> Benth.<br>(Lamiaceae)<br>(SMH-506)                  | Baljaween<br>(JAM),<br>Tumbrak<br>(KAS) | Whole<br>plant | After softening whole<br>plant by pounding on<br>a stone slab is used in<br>making “achar”<br>(Pickle). | Y | Y | N | N | Gujjar,<br>Pahari,<br>Bakarwal              | 0.30 | 285 |
| 124 | <i>Trichosanthes cucumerina</i> L.<br>(Cucurbitaceae)<br>(SMH-357)         | Parhul (JAM)                            | Fruit          | Cooked as vegetable.                                                                                    | N | Y | N | N | Gujjar,<br>Pahari,<br>Bakarwal              | 0.26 | 251 |
| 125 | <i>Trifolium pratense</i> L.<br>(Fabaceae)<br>(SMH-507)                    | Pawera (KAS,<br>JAM)                    | Leaves         | Cooked and used as<br>vegetable. Rarely<br>used as salad.                                               | Y | Y | N | N | Gujjar,<br>Pahari,<br>Bakarwal              | 0.23 | 216 |
| 126 | <i>Trifolium repens</i> L.<br>(Fabaceae)<br>(SMH-508)                      | Chopati (KAS,<br>JAM)                   | Leaves         | Eaten as salad, and<br>cooked as vegetable.                                                             | Y | Y | N | N | Gujjar,<br>Pahari,<br>Bakarwal              | 0.23 | 218 |
| 127 | <i>Trillium govanianum</i> Wall. ex D. Don<br>(Melanthiaceae)<br>(SMH-509) | Tripater,<br>Nagchhatri,<br>Satva (KAS) | Leaves         | Boiled and used as<br>vegetable.                                                                        | Y | N | N | N | Kashmiri,<br>Gujjar,<br>Pahari,<br>Bakarwal | 0.29 | 274 |
| 128 | <i>Tussilago farfara</i> L.<br>(Asteraceae)<br>(AJK-291)                   | Bann Hulla<br>(AJK)                     | Flower         | Flower buds are<br>cooked as vegetable.                                                                 | N | N | N | Y | Gujjar,<br>Pahari,<br>Bakarwal              | 0.25 | 235 |
| 129 | <i>Urtica dioica</i> L.<br>(Urticaceae) (SMH-510)                          | Soi (KAS),<br>Kayyari (JAM)             | Leaves         | Cooked as vegetable.<br>Tea is also prepared<br>from fresh leaves.                                      | Y | Y | N | N | Kashmiri,<br>Gujjar,<br>Pahari,<br>Bakarwal | 0.31 | 298 |

|     |                                                                                |                                                                     |                 |                                                                                                              |   |   |   |   |                                                           |      |     |
|-----|--------------------------------------------------------------------------------|---------------------------------------------------------------------|-----------------|--------------------------------------------------------------------------------------------------------------|---|---|---|---|-----------------------------------------------------------|------|-----|
| 130 | <i>Urtica hyperborea</i> Jacquem. ex Wedd<br>(Urticaceae)<br>(SMH-171)         | Dzatsutt, Zwa<br>(LAD)                                              | Leaves          | Used to prepare soup.                                                                                        | N | N | Y | N | Beda,<br>Brokpa,<br>Balti                                 | 0.22 | 214 |
| 131 | <i>Verbascum thapsus</i> L.<br>(Scrophulariaceae)<br>(SMH-511)                 | Gamhar,<br>Mullei (KAS)                                             | Seed            | Eaten with ghee.                                                                                             | Y | N | N | N | Gujjar,<br>Pahari                                         | 0.29 | 274 |
| 132 | <i>Viburnum grandiflorum</i> Wall. ex DC.<br>(Adoxaceae)<br>(SMH-358, AJK-292) | Jammar,<br>Kulmach<br>(JAM), Guch<br>(AJK)                          | Fruit           | Eaten raw.                                                                                                   | Y | Y | N | Y | Kashmiri,<br>Gujjar,<br>Pahari,<br>Bakarwal,<br>Dogra     | 0.34 | 326 |
| 133 | <i>Viola odorata</i> L.<br>(Violaceae) (SMH-512)                               | Nun posh<br>(KAS), Karpoo<br>(JAM)                                  | Leaves          | Boiled then fried with<br>spices and taken as<br>vegetable.                                                  | Y | Y | N | N | Kashmiri,<br>Gujjar<br>Pahari,<br>Bakarwal                | 0.22 | 214 |
| 134 | <i>Vitis Jacquemontii</i> R. Parker.<br>(Vitaceae)<br>(SMH-359, AJK-293)       | Daakh (JAM,<br>AJK), Gandum<br>(LAD), Jungli<br>Dach, Dach<br>(KAS) | Fruit<br>Leaves | Eaten raw and young<br>leaves are cooked as<br>vegetable.                                                    | Y | Y | Y | Y | Kashmiri,<br>Gujjar,<br>Pahari,<br>Balti, Beda,<br>Brokpa | 0.23 | 218 |
| 135 | <i>Zanthoxylum armatum</i> DC.<br>(Rutaceae)<br>(SMH-515)                      | Timbru,<br>Timbur (JAM)                                             | Fruit           | Grinded with some<br>other herbs like mint<br>to make a paste like<br>substance called<br>"chutney" which is | N | Y | N | N | Gujjar,<br>Pahari,<br>Dogra                               | 0.25 | 241 |

|              |                                                                                 |                                                  |                  |                                                                                                                                  |   |   |   |   |                                          |      |     |
|--------------|---------------------------------------------------------------------------------|--------------------------------------------------|------------------|----------------------------------------------------------------------------------------------------------------------------------|---|---|---|---|------------------------------------------|------|-----|
|              |                                                                                 |                                                  |                  | used to enhance taste of meals.                                                                                                  |   |   |   |   |                                          |      |     |
| 136          | <i>Zanthoxylum aromaticum</i> DC<br>(Rutaceae)<br>(AJK-294)                     | Timbru (AJK),<br>Timbe (AJK)                     | Fruit            | Grinded with some other herbs like mint to make a paste like substance called “chutney” which is used to enhance taste of meals. | N | N | N | Y | Gujjar,<br>Pahari,<br>Bakarwal           | 0.23 | 222 |
| 137          | <i>Ziziphus jujuba</i> Lamk<br>(Rhamnaceae)<br>(SMH-360, AJK-295)               | Beree (AJK),<br>Jand-beri<br>(JAM)               | Fruit            | Eaten raw.                                                                                                                       | N | Y | N | Y | Gujjar,<br>Pahari,<br>Bakarwal,<br>Dogra | 0.20 | 195 |
| 138          | <i>Ziziphus nummularia</i> (Burm. f.) Wight & Arn.<br>(Rhamnaceae)<br>(AJK-296) | Bair (AJK)                                       | Fruit            | Eaten raw.                                                                                                                       | N | N | N | Y | Gujjar,<br>Pahari,<br>Bakarwal           | 0.25 | 236 |
| 139          | <i>Ziziphus oxyphylla</i> Edgew.<br>(Rhamnaceae)<br>(SMH-361)                   | Kokanberii<br>(JAM)                              | Fruit            | Eaten raw.                                                                                                                       | N | Y | N | N | Gujjar,<br>Pahari,<br>Bakarwal,<br>Dogra | 0.24 | 229 |
| <i>Fungi</i> |                                                                                 |                                                  |                  |                                                                                                                                  |   |   |   |   |                                          |      |     |
| 140          | <i>Rhizopogon luteolus</i> Fr. & Nordholm<br>(Rhizopogonaceae)<br>(SMH-346)     | Dudhkutt,<br>Kundi, Kutch,<br>Gav pagur<br>(KAS) | Fruiting<br>body | Consumed as food<br>(Cooked as well as raw).                                                                                     | Y | N | N | N | Kashmiri,<br>Gujjar,<br>Pahari           | 0.24 | 228 |

|     |                                                                           |                                  |                  |                                                          |   |   |   |   |                                             |      |     |
|-----|---------------------------------------------------------------------------|----------------------------------|------------------|----------------------------------------------------------|---|---|---|---|---------------------------------------------|------|-----|
| 141 | <i>Ramaria formosa</i> (Pers.) Quél.<br>(Gomphaceae)<br>(SMH-344)         | Panzanguj,<br>Hapatpaan<br>(KAS) | Fruiting<br>body | Cooked as vegetable.                                     | Y | N | N | N | Kashmiri,<br>Gujjar<br>Pahari               | 0.28 | 265 |
| 142 | <i>Morchella esculenta</i> L.<br>(Morchellaceae)<br>(SMH-332)             | Guchi (JAM),<br>Guch (KAS)       | Fruiting<br>body | Cooked, roasted, and<br>used as vegetable.               | Y | Y | N | N | Kashmiri,<br>Gujjar,<br>Pahari,<br>Dogra    | 0.24 | 234 |
| 143 | <i>Morchella vulgaris</i> (Pers.) Boud.<br>(Morchellaceae)<br>(SMH-333)   | Kannguch,<br>Guuch (KAS)         | Fruiting<br>body | Cooked and used as<br>vegetable.                         | Y | N | N | N | Kashmiri,<br>Gujjar,<br>Pahari              | 0.28 | 265 |
| 144 | <i>Geopora arenicola</i> Lev. Kers<br>(Pyronemataceae)<br>(SMH-453)       | Shazikan<br>(KAS)                | Fruiting<br>body | Cooked as vegetable.                                     | Y | N | N | N | Kashmiri,<br>Pahari,<br>Gujjar,<br>Bakarwal | 0.33 | 318 |
| 145 | <i>Gyromitra esculenta</i> (Pers.) Fr.<br>(Discinaceae)<br>(SMH-324)      | Kankuch (KAS)                    | Fruiting<br>body | Cooked as vegetable.                                     | Y | N | N | N | Kashmiri,<br>Pahari,<br>Gujjar,<br>Bakarwal | 0.22 | 215 |
| 146 | <i>Gyromitra sphaerospora</i> (Peck) Sacc.<br>(Discinaceae)<br>(SMH-325)  | Kankuch,<br>Kanpapdi<br>(KAS)    | Fruiting<br>body | Cooked as vegetable.                                     | Y | N | N | N | Kashmiri,<br>Pahari,<br>Gujjar,<br>Bakarwal | 0.21 | 200 |
| 147 | <i>Flammulina velutipes</i> (Curt.) Singer<br>(Mazasmiaceae)<br>(SMH-321) | Hend, Drubdi<br>(KAS)            | Fruiting<br>body | Consumed as<br>vegetable especially<br>by Pahari people. | Y | N | N | N | Kashmiri,<br>Pahari,<br>Bakarwal            | 0.20 | 195 |

|                |                                                                             |                                 |                                                      |                                                                                                          |   |   |   |   |                                             |      |     |
|----------------|-----------------------------------------------------------------------------|---------------------------------|------------------------------------------------------|----------------------------------------------------------------------------------------------------------|---|---|---|---|---------------------------------------------|------|-----|
| 148            | <i>Coprinus atramentarius</i> (Bull. Fr.) Fr.<br>(Coprinaceae)<br>(SMH-313) | Sakerbub,<br>Sakerboob<br>(KAS) | Fruiting<br>body                                     | Cooked as vegetable.                                                                                     | Y | N | N | N | Kashmiri,<br>Pahari<br>Gujjar,<br>Bakarwal  | 0.20 | 198 |
| 149            | <i>Coprinus comatus</i> (O.F. Müll.) Pers.<br>(Coprinaceae)<br>(SMH-314)    | Setherwat<br>(KAS)              | Fruiting<br>body                                     | Cooked as vegetable<br>during the early<br>stages.                                                       | Y | N | N | N | Pahari,<br>Gujjar,<br>Bakarwal              | 0.22 | 210 |
| 150            | <i>Calocera viscosa</i> (Pers.) Fr.<br>(Dacrymycetaceae)<br>(SMH-309)       | Paunzaunguje<br>(KAS)           | Fruiting<br>body                                     | Cooked as vegetable                                                                                      | Y | N | N | N | Kashmiri,<br>Gujjar,<br>Pahari,<br>Bakarwal | 0.23 | 224 |
| 151            | <i>Agaricus bisporus</i> (Lange) Bach.<br>(Agaricaceae)<br>(SMH- 301)       | Maaz hadur,<br>Haind (KAS)      | Fruiting<br>body                                     | Cooked as vegetable.                                                                                     | Y | N | N | N | Kashmiri,<br>Gujjar,<br>Pahari,<br>Bakarwal | 0.27 | 256 |
| 152            | <i>Agaricus campestris</i> (L.) Fr.<br>(Agaricaceae) (SMH- 302)             | Maazhhadur<br>(KAS)             | Fruiting<br>body                                     | Cooked as vegetable.                                                                                     | Y | N | N | N | Kashmiri,<br>Gujjar,<br>Pahari,<br>Bakarwal | 0.25 | 241 |
| <i>Mammals</i> |                                                                             |                                 |                                                      |                                                                                                          |   |   |   |   |                                             |      |     |
| 153            | <i>Boselaphus tragocamelus</i> Blainville, 1816<br>(Bovidae)                | Neelee gaan,<br>Nail Gai (JAM)  | Bush<br>meat<br>Trotters<br>Heart<br>Lungs<br>Kidney | Meat is smoke-<br>roasted, dried, and<br>cooked, Trotters,<br>heart, lungs, kidney,<br>spleen are simply | N | Y | N | N | Gujjar,<br>Pahari,<br>Bakarwal              | 0.26 | 246 |



|     |                                                         |                                                 |                                                                         |                                                                                                                                                   |   |   |   |   |                                               |      |     |
|-----|---------------------------------------------------------|-------------------------------------------------|-------------------------------------------------------------------------|---------------------------------------------------------------------------------------------------------------------------------------------------|---|---|---|---|-----------------------------------------------|------|-----|
|     |                                                         |                                                 | Spleen                                                                  | cooked and taken with rice.                                                                                                                       |   |   |   |   |                                               |      |     |
| 154 | <i>Capra falconeri</i> Wagner, 1839<br>(Bovidae)        | Markhor (JAM, KAS, AJK)                         | Bush<br>meat<br>Brain<br>Trotters<br>Heart<br>Lungs<br>Kidney<br>Spleen | Meat is smoke-roasted, dried, and cooked. Brain is fried. Trotters, heart, lungs, kidney, spleen are cooked and eaten with rice and Naan (bread). | Y | Y | N | Y | Gujjar, Pahari, Bakarwal                      | 0.32 | 310 |
| 155 | <i>Capra sibirica</i> Pallas, 1776<br>(Bovidae)         | Jangli bakri (AJK), Killbakri (JAM), Skin (LAD) | Bush<br>meat<br>Brain<br>Trotters<br>Heart<br>Lungs<br>Kidney<br>Spleen | Meat is smoke-roasted dried, and cooked. Brain is fried. Trotters, heart, lungs, kidney, spleen are cooked and eaten with rice and Naan.          | N | Y | Y | Y | Gujjar, Pahari, Bakarwal, Beda, Balti, Brokpa | 0.29 | 274 |
| 156 | <i>Cervus elaphus hanglu</i> Wagner, 1844<br>(Cervidae) | Hangul (KAS)                                    | Bush<br>meat<br>Trotter<br>Heart<br>Lungs<br>Kidney<br>Spleen           | Meat is smoke-roasted dried, and cooked. Trotters, heart, lungs, kidney, spleen are cooked and eaten with rice and Naan.                          | Y | N | N | N | Kashmiri                                      | 0.32 | 310 |

|     |                                                         |                                                |                                                                |                                                                                                                                                                   |   |   |   |   |                                                |      |     |
|-----|---------------------------------------------------------|------------------------------------------------|----------------------------------------------------------------|-------------------------------------------------------------------------------------------------------------------------------------------------------------------|---|---|---|---|------------------------------------------------|------|-----|
| 157 | <i>Hemitragus jemlahicus</i> Hodgson, 1841<br>(Bovidae) | Karth, Jagla<br>(JAM)                          | Bush<br>meat<br>Trotters<br>Heart<br>Lungs<br>Kidney<br>Spleen | Meat is smoke-<br>roasted, dried, and<br>cooked.<br>Trotters, heart, lungs,<br>kidney, spleen are<br>cooked, fried and<br>eaten.                                  | N | Y | N | N | Gujjar,<br>Pahari,<br>Bakarwal                 | 0.24 | 225 |
| 158 | <i>Lepus oiostolus</i> Hodgson, 1840<br>(Leporidae)     | Ribong (LAD),<br>Jangli-<br>khargoosh<br>(JAM) | Bush<br>meat                                                   | Cooked, fried and<br>eaten.                                                                                                                                       | N | Y | Y | N | Gujjar,<br>Pahari,<br>Bakarwal,<br>Beda, Balti | 0.25 | 241 |
| 159 | <i>Marmota himalayana</i> Hodgson, 1841<br>(Sciuridae)  | Phia (LAD)                                     | Bush<br>meat                                                   | Cooked, fried and<br>eaten.                                                                                                                                       | N | N | Y | N | Balti, Beda,<br>Brokpa                         | 0.22 | 214 |
| 160 | <i>Moschus moschiferus</i> L. 1758<br>(Cervidae)        | Hern (KAS),<br>Kusturee<br>(JAM) (AJK)         | Bush<br>meat<br>Trotters<br>Heart<br>Lungs<br>Kidney           | Meat is smoke-<br>roasted dried, and<br>cooked. Trotters,<br>heart, lungs, kidney<br>are cooked and eaten<br>with Naan (bread)<br>and rice or fried and<br>eaten. | Y | Y | N | Y | Kashmiri,<br>Gujjar,<br>Pahari,<br>Bakarwal    | 0.21 | 200 |
| 161 | <i>Muntiacus muntjak</i> Zimmermann, 1780<br>(Cervidae) | Kakkar (KAS,<br>JAM, AJK)                      | Bush<br>meat                                                   | Smoke- roasted,<br>dried, and cooked<br>and eaten.                                                                                                                | Y | Y | N | Y | Kashmiri,<br>Gujjar,<br>Pahari,<br>Bakarwal    | 0.23 | 216 |

|     |                                                         |                                      |                                                                |                                                                                                                                                                |   |   |   |   |                               |      |     |
|-----|---------------------------------------------------------|--------------------------------------|----------------------------------------------------------------|----------------------------------------------------------------------------------------------------------------------------------------------------------------|---|---|---|---|-------------------------------|------|-----|
| 162 | <i>Naemorhedus goral</i> Hardwicke, 1825<br>(Bovidae)   | Pijjar (JAM)<br>(AJK)<br>Goral (AJK) | Bush<br>meat<br>Trotters<br>Heart<br>Lungs<br>Kidney           | Meat is smoke-<br>roasted, dried, and<br>cooked.<br>Trotters, heart, lungs,<br>kidney are cooked<br>and eaten with Naan<br>(bread), riceor fried<br>and eaten. | N | Y | N | Y | Gujjar,<br>Pahari<br>Bakarwal | 0.25 | 243 |
| 163 | <i>Ovis ammon</i> L., 1758<br>(Bovidae)                 | Nyan (LAD)                           | Bush<br>meat<br>Trotters<br>Heart<br>Lungs<br>Kidney<br>Spleen | Meat is dried and<br>cooked.<br>Trotters, heart, lungs,<br>kidney, spleen are<br>cooked and eaten.                                                             | N | N | Y | N | Beda, Balti,<br>Brokpa        | 0.22 | 210 |
| 164 | <i>Ovis aries vignei</i> Blyth, 1841<br>(Bovidae)       | Shapo (LAD)                          | Bush<br>meat<br>Trotters<br>Heart<br>Lungs<br>Kidney<br>Spleen | Meat is dried and<br>cooked. Trotters,<br>heart, lungs, kidney,<br>spleen are cooked.                                                                          | N | N | Y | N | Beda, Balti,<br>Brokpa        | 0.29 | 275 |
| 165 | <i>Procapra picticaudata</i> Hodgson, 1846<br>(Bovidae) | Goa (LAD)                            | Bush<br>meat<br>Trotters<br>Heart                              | Meat is dried and<br>cooked.                                                                                                                                   | N | N | Y | N | Beda, Balti,<br>Brokpa        | 0.23 | 220 |

|              |                                                          |                                                         |                                                                |                                                                                                                                                       |   |   |   |   |                                                     |      |     |
|--------------|----------------------------------------------------------|---------------------------------------------------------|----------------------------------------------------------------|-------------------------------------------------------------------------------------------------------------------------------------------------------|---|---|---|---|-----------------------------------------------------|------|-----|
|              |                                                          |                                                         | Lungs<br>Kidney<br>Spleen                                      | Trotters, heart, lungs,<br>kidney, spleen are<br>cooked and eaten.                                                                                    |   |   |   |   |                                                     |      |     |
| 166          | <i>Pseudois nayaur</i> Hodgson, 1833<br>(Bovidae)        | Napo (LAD)                                              | Bush<br>meat<br>Trotters<br>Heart<br>Lungs<br>Kidney<br>Spleen | Meat is dried and<br>cooked.<br>Trotters, heart, lungs,<br>kidney, spleen are<br>cooked and eaten as<br>such.                                         | N | N | Y | N | Beda, Balti,<br>Brokpa                              | 0.32 | 305 |
| <i>Birds</i> |                                                          |                                                         |                                                                |                                                                                                                                                       |   |   |   |   |                                                     |      |     |
| 167          | <i>Alectoris chukar</i> J.E. Gray, 1830<br>(Phasianidae) | Vankukur<br>(KAS) Chukar<br>(KAS) (JAM)<br>Srakpa (LAD) | Bush<br>meat<br>Egg                                            | Meat is cooked and<br>eaten with rice or<br>Naan (bread). Soup is<br>also made from the<br>fresh meat.<br>Eggs are boiled or<br>fried taken with tea. | Y | Y | Y | N | Kashmiri,<br>Gujjar<br>Pahari,<br>Bakarwal<br>Balti | 0.37 | 356 |
| 168          | <i>Anas acuta</i> L., 1758<br>(Anatidae)                 | Pechin (KAS)                                            | Bush<br>meat<br>Gizzard                                        | Meat is cooked and<br>eaten with rice or<br>Naan (bread). Soup is<br>also made from the<br>fresh meat. Gizzard is<br>cooked and eaten.                | Y | N | N | N | Kashmiri                                            | 0.32 | 306 |

|     |                                                       |                                              |                         |                                                                                                                                                                                                        |   |   |   |   |                                                            |      |     |
|-----|-------------------------------------------------------|----------------------------------------------|-------------------------|--------------------------------------------------------------------------------------------------------------------------------------------------------------------------------------------------------|---|---|---|---|------------------------------------------------------------|------|-----|
|     |                                                       |                                              |                         | Eggs are boiled or fried and consumed with tea.                                                                                                                                                        |   |   |   |   |                                                            |      |     |
| 169 | <i>Columba livia</i> , Gmelin, 1789<br>(Columbidae)   | Kotur (KAS)<br>Kubutar (AJK)<br>Mukron (LAD) | Bush<br>meat<br>Gizzard | Meat is cooked and eaten with rice or Naan (bread). Soup is also made from the gizzard.                                                                                                                | Y | N | Y | Y | Kashmiri,<br>Gujjar,<br>Pahari,<br>Balti, Beda,<br>Braokpa | 0.26 | 245 |
| 170 | <i>Columba rupestris</i> Pallas, 1811<br>(Columbidae) | Mukron (LAD)                                 | Bush<br>meat<br>Gizzard | Both meat and gizzard are cooked and eaten with rice or Naan (bread)                                                                                                                                   | N | N | Y | N | Beda, Balti,<br>Brokpa                                     | 0.22 | 213 |
| 171 | <i>Hirundo rustica</i> L., 1758<br>(Hirundinidae)     | Katij (KAS)<br>Ababeel (AJK)                 | Bush<br>meat            | Cooked or fried and eaten with Naan (bread). In Azad Kashmir, the use of <i>Hirundo rustica</i> is prohibited by the religious scholars, saying that the species have protected the holy Kaba in past. | Y | N | N | Y | Kashmiri,<br>Gujjar,<br>Pahari                             | 0.20 | 195 |
| 172 | <i>Ixobrychus minutus</i> L., 1766<br>(Ardeidae)      | Gui (KAS)                                    | Bush<br>meat            | Cooked or fried and eaten with Naan (bread).                                                                                                                                                           | Y | N | N | N | Kashmiri                                                   | 0.20 | 199 |

|     |                                                                |                                                  |                         |                                                                                               |   |   |   |   |                                             |      |     |
|-----|----------------------------------------------------------------|--------------------------------------------------|-------------------------|-----------------------------------------------------------------------------------------------|---|---|---|---|---------------------------------------------|------|-----|
| 173 | <i>Jynx torquilla</i> L., 1758<br>(Picidae)                    | Viri Mot (KAS)                                   | Bush<br>meat            | Cooked or fried and<br>eaten with Naan<br>(bread).                                            | Y | N | N | N | Kashmiri                                    | 0.22 | 210 |
| 174 | <i>Lophophorus impejanus</i> Latham, 1790<br>(Phasianidae)     | Wan Kokur,<br>Jungli murga,<br>Son Murg<br>(KAS) | Bush<br>meat<br>Gizzard | Both meat and<br>gizzard are cooked.<br>Soup is made from<br>the meat.                        | Y | N | N | N | Kashmiri,<br>Gujjar,<br>Pahari,<br>Bakarwal | 0.21 | 205 |
| 175 | <i>Oenanthe oenanthe</i> L., 1758<br>(Sylviidae)               | Tirki (AJK)                                      | Bush<br>meat            | Cooked fried and<br>eaten with Naan<br>(bread).                                               | N | N | N | Y | Kashmiri,<br>Gujjar,<br>Pahari              | 0.22 | 209 |
| 176 | <i>Passer domesticus</i> L., 1758<br>(Passeridae)              | Chaer (KAS)<br>Chidrea (AJK)                     | Bush<br>meat            | Cooked fried and<br>eaten with Naan<br>(bread).                                               | Y | N | N | Y | Kashmiri,<br>Gujjar,<br>Pahari              | 0.23 | 221 |
| 177 | <i>Pavo cristatus</i> L., 1758<br>(Phasianidae)                | Moor (JAM)                                       | Bush<br>meat<br>Egg     | Meat is cooked fried<br>and eaten with Naan<br>Eggs are boiled fried<br>and eaten.            | N | Y | N | N | Gujjar,<br>Pahari,<br>Bakarwal              | 0.22 | 214 |
| 178 | <i>Pucrasia macrolopha</i> G.R. Gray, 1841<br>(Phasianidae)    | Vankukur<br>(KAS)<br>Jangli Murga<br>(KAS)       | Bush<br>meat<br>Gizzard | Both meat and<br>gizzard are cooked<br>and eaten with rice.<br>Soup is made from<br>the meat. | Y | N | N | N | Kashmiri,<br>Gujjar,<br>Pahari,<br>Bakarwal | 0.23 | 219 |
| 179 | <i>Streptopelia decaocto</i> Frivaldszky, 1838<br>(Columbidae) | Kukil (KAS,<br>(AJK)                             | Bush<br>meat            | Cooked and eaten<br>with rice or Naan<br>(bread).                                             | Y | N | N | Y | Kashmiri,<br>Gujjar,<br>Pahari              | 0.24 | 225 |

|     |                                                                      |                    |                         |                                                                                                                      |   |   |   |   |                                |      |     |
|-----|----------------------------------------------------------------------|--------------------|-------------------------|----------------------------------------------------------------------------------------------------------------------|---|---|---|---|--------------------------------|------|-----|
| 180 | <i>Streptopelia orientalis</i> Latham, 1790<br>(Columbidae)          | Wan Kukil<br>(KAS) | Bush<br>meat            | Cooked and eaten<br>with rice or Naan<br>(bread)..                                                                   | Y | N | N | N | Kashmiri,<br>Gujjar,<br>Pahari | 0.24 | 227 |
| 181 | <i>Streptopelia tranquebarica</i> Hermann, 1804<br>(Columbidae)      | Koggi (AJK)        | Bush<br>meat            | Cooked, fried and<br>eaten with rice or<br>naan (bread).                                                             | N | N | N | Y | Kashmiri,<br>Gujjar,<br>Pahari | 0.23 | 219 |
| 182 | <i>Tadorna ferruginea</i> , Pallas, 1764<br>(Anatidae)               | Surkhab (KAS)      | Bush<br>meat<br>Gizzard | Both meat and<br>gizzard are cooked<br>eaten with rice.                                                              | Y | N | N | N | Kashmiri                       | 0.25 | 234 |
| 183 | <i>Tetraogallus himalayensis</i> G.R. Gray,<br>1843<br>(Phasianidae) | Ripja (LAD)        | Bush<br>meat<br>Gizzard | Both meat and<br>gizzard are cooked<br>and eaten with rice or<br>chapatii (bread). Soup<br>is made from the<br>meat. | N | N | Y | N | Brokpa,<br>Beda, Balti         | 0.23 | 216 |
| 184 | <i>Tetraogallus tibetanus</i> Gould, 1854<br>(Phasianidae)           | Ticok (LAD)        | Bush<br>meat<br>Gizzard | Both meat and<br>gizzard are cooked<br>and eaten with<br>chapatii (bread). Soup<br>is made from the<br>meat.         | N | N | Y | N | Brokpa,<br>Beda, Balti         | 0.23 | 219 |
| 185 | <i>Columba leuconota</i> Vigors, 1831<br>(Columbidae)                | Mickron (LAD)      | Bush<br>meat<br>Gizzard | Both meat and<br>gizzard are cooked<br>and eaten with<br>chapatii (bread).                                           | N | N | Y | N | Brokpa,<br>Beda, Balti         | 0.23 | 218 |

|             |                                                         |                                            |                                  |                                                                                                                               |   |   |   |   |                                |      |     |
|-------------|---------------------------------------------------------|--------------------------------------------|----------------------------------|-------------------------------------------------------------------------------------------------------------------------------|---|---|---|---|--------------------------------|------|-----|
| 186         | <i>Perdix hodgsoniae</i> Hodgson, 1857<br>(Phasianidae) | Srakpa, Riibya<br>(LAD)                    | Bush<br>meat<br>Gizzard          | Both meat and<br>gizzard are cooked<br>and eaten with<br>chapatii (bread).                                                    | N | N | Y | N | Beda, Balti,<br>Brokpa         | 0.21 | 200 |
| 187         | <i>Anser anser</i> L., 1758<br>(Anatidae)               | Toskar (LAD)                               | Bush<br>meat<br>Gizzard          | Both meat and<br>gizzard are cooked<br>and eaten with<br>chapatii (bread).                                                    | N | N | Y | N | Beda, Balti,<br>Brokpa         | 0.22 | 206 |
| 188         | <i>Anas platyrhynchos</i> L., 1758<br>(Anatidae)        | Chuybya<br>(LAD)                           | Bush<br>meat<br>Gizzard          | Meat is cooked, fried<br>eaten with rice. Soup<br>is made from the<br>meat.                                                   | N | N | Y | N | Brokpa,<br>Balti               | 0.21 | 197 |
| <i>Fish</i> |                                                         |                                            |                                  |                                                                                                                               |   |   |   |   |                                |      |     |
| 189         | <i>Barbus sarana</i> Hamilton, 1822<br>(Cyprinidae)     | Devgaad (KAS)<br>Machlii (JAM,<br>AJK)     | Flesh                            | Smoked, cooked and<br>eaten with rice or<br>chapatii (bread).                                                                 | Y | Y | N | Y | Kashmiri,<br>Gujjar,<br>Pahari | 0.22 | 210 |
| 190         | <i>Catla catla</i> F. Hamilton, 1822<br>(Cyprinidae)    | Punjaibgaad<br>(KAS) Machlii<br>(JAM, AJK) | Flesh,<br>Coagulate<br>d protein | Flesh is smoked,<br>dried, cooked and<br>eaten with rice or<br>chapatii (bread).<br>Coagulated protein is<br>fried and eaten. | Y | Y | N | Y | Kashmiri,<br>Gujjar,<br>Pahari | 0.34 | 325 |
| 191         | <i>Cirrhinus cirrhosus</i> Bloch, 1795<br>(Cyprinidae)  | Chmakgaad<br>(KAS), Machlii<br>(AJK)       | Flesh<br>Coagulate<br>d protein  | Flesh is smoked,<br>dried, cooked and<br>eaten with rice or<br>chapatii (bread).                                              | Y | N | N | Y | Kashmiri,<br>Gujjar,<br>Pahari | 0.26 | 245 |



|     |                                                          |                                                      |                                  |                                                                                                 |   |   |   |   |                                         |      |     |
|-----|----------------------------------------------------------|------------------------------------------------------|----------------------------------|-------------------------------------------------------------------------------------------------|---|---|---|---|-----------------------------------------|------|-----|
|     |                                                          |                                                      |                                  | Coagulated protein is fried and eaten.                                                          |   |   |   |   |                                         |      |     |
| 192 | <i>Labeo calbasu</i> Hamilton, 1822<br>(Cyprinidae)      | Machalyiee,<br>Darvaioagaad<br>(AJK)                 | Flesh,<br>Coagulate<br>d protein | Flesh is smoked,<br>cooked and eaten<br>with rice. Coagulated<br>protein is fried and<br>eaten. | N | N | N | Y | Kashmiri,<br>Gujjar,<br>Pahari          | 0.23 | 215 |
| 193 | <i>Labeo dero</i> Hamilton, 1822<br>(Cyprinidae)         | Machlii (JAM),<br>Daryaavgaad<br>(AJK)               | Flesh<br>Coagulate<br>d protein  | Flesh is cooked, fried<br>and eaten.<br>Coagulated protein is<br>fried and consumed.            | N | Y | N | Y | Kashmiri,<br>Gujjar,<br>Pahari          | 0.25 | 241 |
| 194 | <i>Oncorhynchus mykiss</i> Walbaum, 1792<br>(Salmonidae) | Kulgaad<br>(KAS), Trout<br>(AJK)<br>Nya (LAD)        | Flesh                            | Fried and consumed.                                                                             | Y | N | Y | Y | Kashmiri,<br>Gujjar,<br>Pahari,<br>Beda | 0.21 | 200 |
| 195 | <i>Puntius ticto</i> F. Hamilton, 1822<br>(Cyprinidae)   | Sungaad (AJK),<br>Machli (JAM)                       | Flesh                            | Fried and consumed.                                                                             | N | Y | N | Y | Kashmir,<br>Gujjar,<br>Pahari           | 0.30 | 285 |
| 196 | <i>Salmo trutta fario</i> L., 1758<br>(Salmonidae)       | Naalgaad<br>(KAS), Trout<br>(JAM, AJK),<br>Nya (LAD) | Flesh                            | Fried and consumed                                                                              | Y | Y | Y | Y | Kashmiri,<br>Gujjar<br>Pahari,<br>Beda  | 0.25 | 236 |
| 197 | <i>Schizopyge niger</i> Heckel, 1838<br>(Cyprinidae)     | Alegaad,<br>Kashir Gaad<br>(KAS)                     | Flesh<br>Coagulate<br>d protein  | Flesh is smoked,<br>dried, cooked and<br>consumed with rice.<br>Coagulated protein is           | Y | N | N | N | Kashmiri                                | 0.37 | 352 |

|     |                                                            |                                     |                          |                                                                                                                                           |   |   |   |   |                          |      |     |
|-----|------------------------------------------------------------|-------------------------------------|--------------------------|-------------------------------------------------------------------------------------------------------------------------------------------|---|---|---|---|--------------------------|------|-----|
|     |                                                            |                                     |                          | fried and consumed. Dried fishes are consumed in harsh winters.                                                                           |   |   |   |   |                          |      |     |
| 198 | <i>Schizothorax esocinus</i> Heckel, 1838 (Cyprinidae)     | Chhurru, Kashir Gaad (KAS)          | Flesh Coagulated protein | Flesh is smoked, dried, cooked and consumed with rice. Coagulated protein is fried and eaten. Dried fishes are consumed in harsh winters. | Y | N | N | N | Kashmiri                 | 0.25 | 241 |
| 199 | <i>Schizothorax labiatus</i> McClelland, 1842 (Cyprinidae) | Chush (KAS) , Nya (LAD)             | Flesh Coagulated protein | Flesh is smoked, dried, cooked and consumed with rice. Coagulated protein is fried and eaten. Dried fishes are consumed in harsh winters. | Y | N | Y | N | Kashmiri, Beda Balti     | 0.21 | 200 |
| 200 | <i>Schizothorax plagiostomus</i> Heckel, 1838 (Cyprinidae) | Khont (KAS), Kashmiri machlii (AJK) | Flesh Coagulated protein | Flesh is smoked, dried, cooked and consumed with rice. Coagulated protein is fried and eaten.                                             | Y | N | N | Y | Kashmiri, Gujjar, Pahari | 0.34 | 324 |

|     |                                                               |                                |                              |                                                                                         |   |   |   |   |                          |      |     |
|-----|---------------------------------------------------------------|--------------------------------|------------------------------|-----------------------------------------------------------------------------------------|---|---|---|---|--------------------------|------|-----|
|     |                                                               |                                |                              | Dried fishes are consumed in harsh winters.                                             |   |   |   |   |                          |      |     |
| 201 | <i>Triplophysa kashmirensis</i> Hora, 1922<br>(Nemacheilidae) | Jhelumgaad (KAS), Machli (AJK) | Flesh                        | Cooked, dried, and consumed with rice.                                                  | Y | N | N | Y | Kashmiri, Gujjar, Pahari | 0.33 | 310 |
| 202 | <i>Schizothorax curvifrons</i> Heckel, 1838<br>(Cyprinidae)   | Satar, Kashir gaad (KAS)       | Flesh<br>Coagulated proteins | Flesh is smoked, cooked, and eaten with rice. Coagulated protein is fried and consumed. | Y | N | N | N | Kashmiri                 | 0.36 | 342 |
| 203 | <i>Labeo dyocheilus</i> , McClelland, 1839<br>(Cyprinidae)    | Punjaibgaad (KAS)              | Flesh<br>Coagulated protein  | Cooked and consumed with rice.                                                          | Y | N | N | N | Kashmiri                 | 0.30 | 285 |
| 204 | <i>Crossocheilus latius</i> Hamilton, 1822<br>(Cyprinidae)    | Naalgaad (KAS), Machlii (JAM)  | Flesh                        | Cooked and consumed with rice.                                                          | Y | Y | N | N | Kashmiri                 | 0.29 | 274 |
| 205 | <i>Glyptothorax kashmiriensis</i> Hora, 1923<br>(Sisoridae)   | Devgaad (KAS)<br>Machi (AJK)   | Flesh                        | Cooked and consumed with rice.                                                          | Y | N | N | Y | Kashmiri, Pahari         | 0.26 | 246 |
| 206 | <i>Crossocheilus diplochilus</i> Heckel, 1838<br>(Cyprinidae) | Tetther (KAS)                  | Flesh                        | Cooked and consumed with rice.                                                          | Y | N | N | N | Kashmiri, Gujjar         | 0.28 | 271 |
| 207 | <i>Puntius conchonicus</i> F. Hamilton, 1822<br>(Cyprinidae)  | Roasy (KAS)                    | Flesh                        | Cooked and consumed with rice.                                                          | Y | N | N | N | Kashmiri                 | 0.25 | 238 |
| 208 | <i>Gambusia affinis</i> Poey ,1854<br>(Poeciliidae)           | Gambezi (KAS)<br>(JAM)         | Flesh                        | Cooked and consumed with rice.                                                          | Y | Y | N | N | Kashmiri                 | 0.22 | 208 |

|     |                                                      |                                    |       |                                   |   |   |   |   |          |      |     |
|-----|------------------------------------------------------|------------------------------------|-------|-----------------------------------|---|---|---|---|----------|------|-----|
| 209 | <i>Gambusia alvarezi</i> Poey ,1854<br>(Poeciliidae) | Ledargaad<br>(KAS)<br>Machli (JAM) | Flesh | Cooked and<br>consumed with rice. | Y | Y | N | N | Kashmiri | 0.25 | 238 |
|-----|------------------------------------------------------|------------------------------------|-------|-----------------------------------|---|---|---|---|----------|------|-----|

Regions from which species are reported are abbreviated as: Azad Kashmir (AJK), Ladakh (LAD), Jammu (JAM), Kashmir (KAS)
